# Supplementary material
Source: publisher figshare collection journal article supplement (https://adisjournals.figshare.com/ndownloader/files/30641994)
Supplement: Supplementary file 1 [file 30641994]

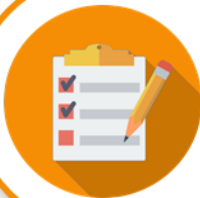

## Decreasing trends in gastroenteritis and pneumococcal disease incidence and mortality after universal vaccination in children in Ecuador.

### PNEUMOCOCCAL DISEASE

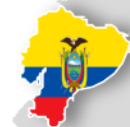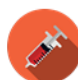

**2011:** Implementation of PCV in the NIP

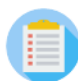

Retrospective database study with time-trend analysis from 2005–2017, using country-wide national surveillance data

#### KEY FINDINGS

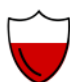

**Coverage: 41–84%** for the 3<sup>rd</sup> dose

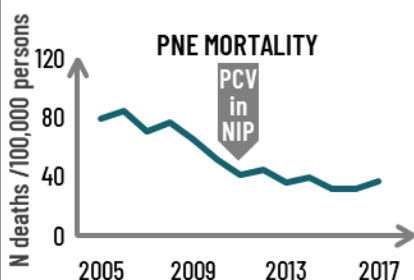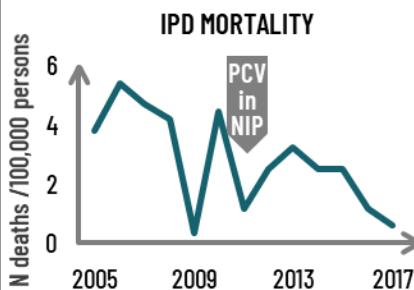

**Significant decrease of 41% for PNE mortality and 51% for IPD mortality in post-vaccination.**

### ROTAVIRUS

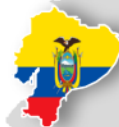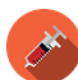

**2007:** Implementation of HRV in the NIP

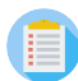

Retrospective database study with time-trend analysis from 2005–2017, using country-wide national surveillance data

#### KEY FINDINGS

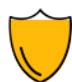

**Coverage: 79–97%** for the 2<sup>nd</sup> dose

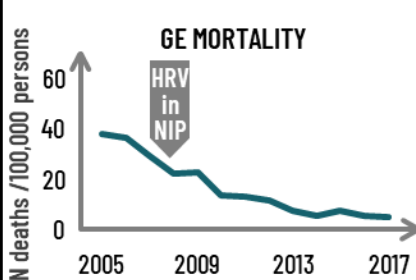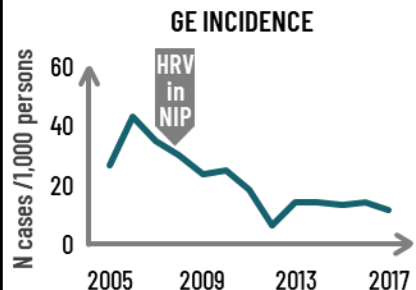

**Decline of 72% for GE mortality and 51% for GE incidence in post-vaccination.**

GE: gastroenteritis; HRV: Human-attenuated rotavirus vaccine; IPD: invasive pneumococcal disease; NIP: National Immunization Program; PCV: pneumococcal conjugate vaccine; PNE: pneumonia; RV: rotavirus. This infographic represents the opinions of the authors. For a full list of declarations, including funding and author disclosure statements, please see the full text online. © The authors, CC-BY-NC 2021.

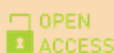

OPEN ACCESS

PEER-REVIEWED INFOGRAPHIC

Adis

Ecuador: Incidence and mortality trends of acute gastroenteritis and pneumococcal disease in children following universal rotavirus and pneumococcal conjugate vaccination. Julio P, Guzman-Holst A, Gupta V, Velez C, Rosales T, Torres C.

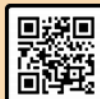

SCAN ME
